# Supplementary material
Source: PubMed Central journal article supplement (PMC4888594)

**Supplemental Table 1. Pharmacokinetic-Pharmacodynamic Model Development for Rifampin.**

Effect of Covariates on Baseline Hazard

| <b>Covariates</b>       | <b>Model</b>               | <b>-2 Log Likelihood</b> | <b>P Value</b> |
|-------------------------|----------------------------|--------------------------|----------------|
| Time                    | Reference                  | 300.886                  | -              |
| Arm                     | Discrete                   | 295.742                  | 0.076          |
| Sex                     | Discrete                   | 300.478                  | 0.815          |
| HIV                     | Discrete                   | 297.368                  | 0.172          |
| Plasma AUC              | Step, AUC = 70 mg*h/L      | 296.832                  | 0.132          |
| Plasma AUC              | Step, AUC = 80 mg*h/L      | 293.191                  | 0.021          |
| Plasma AUC              | Step, AUC = 90 mg*h/L      | 293.653                  | 0.027          |
| Plasma AUC              | Linear                     | 298.867                  | 0.364          |
| Plasma C <sub>max</sub> | Linear                     | 296.783                  | 0.129          |
| CSF AUC                 | Linear                     | 299.270                  | 0.446          |
| CSF C <sub>max</sub>    | Linear                     | 306.388                  | 0.999          |
| Age                     | Linear                     | 300.849                  | 0.982          |
| Weight                  | Linear                     | 303.462                  | 0.999          |
| Plasma AUC              | E <sub>max</sub>           | 294.467                  | 0.040          |
| Plasma C <sub>max</sub> | E <sub>max</sub>           | 293.196                  | 0.021          |
| CSF AUC                 | E <sub>max</sub>           | 295.676                  | 0.074          |
| CSF C <sub>max</sub>    | E <sub>max</sub>           | 295.731                  | 0.076          |
| Age                     | E <sub>max</sub>           | 303.116                  | 0.999          |
| Weight                  | E <sub>max</sub>           | 303.445                  | 0.999          |
| Plasma AUC              | Sigmoidal E <sub>max</sub> | 291.596                  | 0.010          |
| Plasma C <sub>max</sub> | Sigmoidal E <sub>max</sub> | 293.099                  | 0.020          |
| CSF AUC                 | Sigmoidal E <sub>max</sub> | 294.292                  | 0.037          |

|               |                |         |       |
|---------------|----------------|---------|-------|
| CSF $C_{max}$ | Sigmoidal Emax | 294.037 | 0.033 |
| Age           | Sigmoidal Emax | 300.887 | 0.999 |
| Weight        | Sigmoidal Emax | 300.887 | 0.999 |

**Supplemental Table 2. Stochastic simulations assuming 30% variability in clearance and target of 92 mg\*h/L**

| IV Dose (mg/kg) | Percent (%) of Children above Target | Oral Dose (mg/kg) | Percent (%) of Children above Target |
|-----------------|--------------------------------------|-------------------|--------------------------------------|
| 15              | 49                                   | 30                | 49                                   |
| 20              | 82                                   | 40                | 82                                   |
| 25              | 95                                   | 45                | 91                                   |
| 30              | 99                                   | 60                | 99                                   |

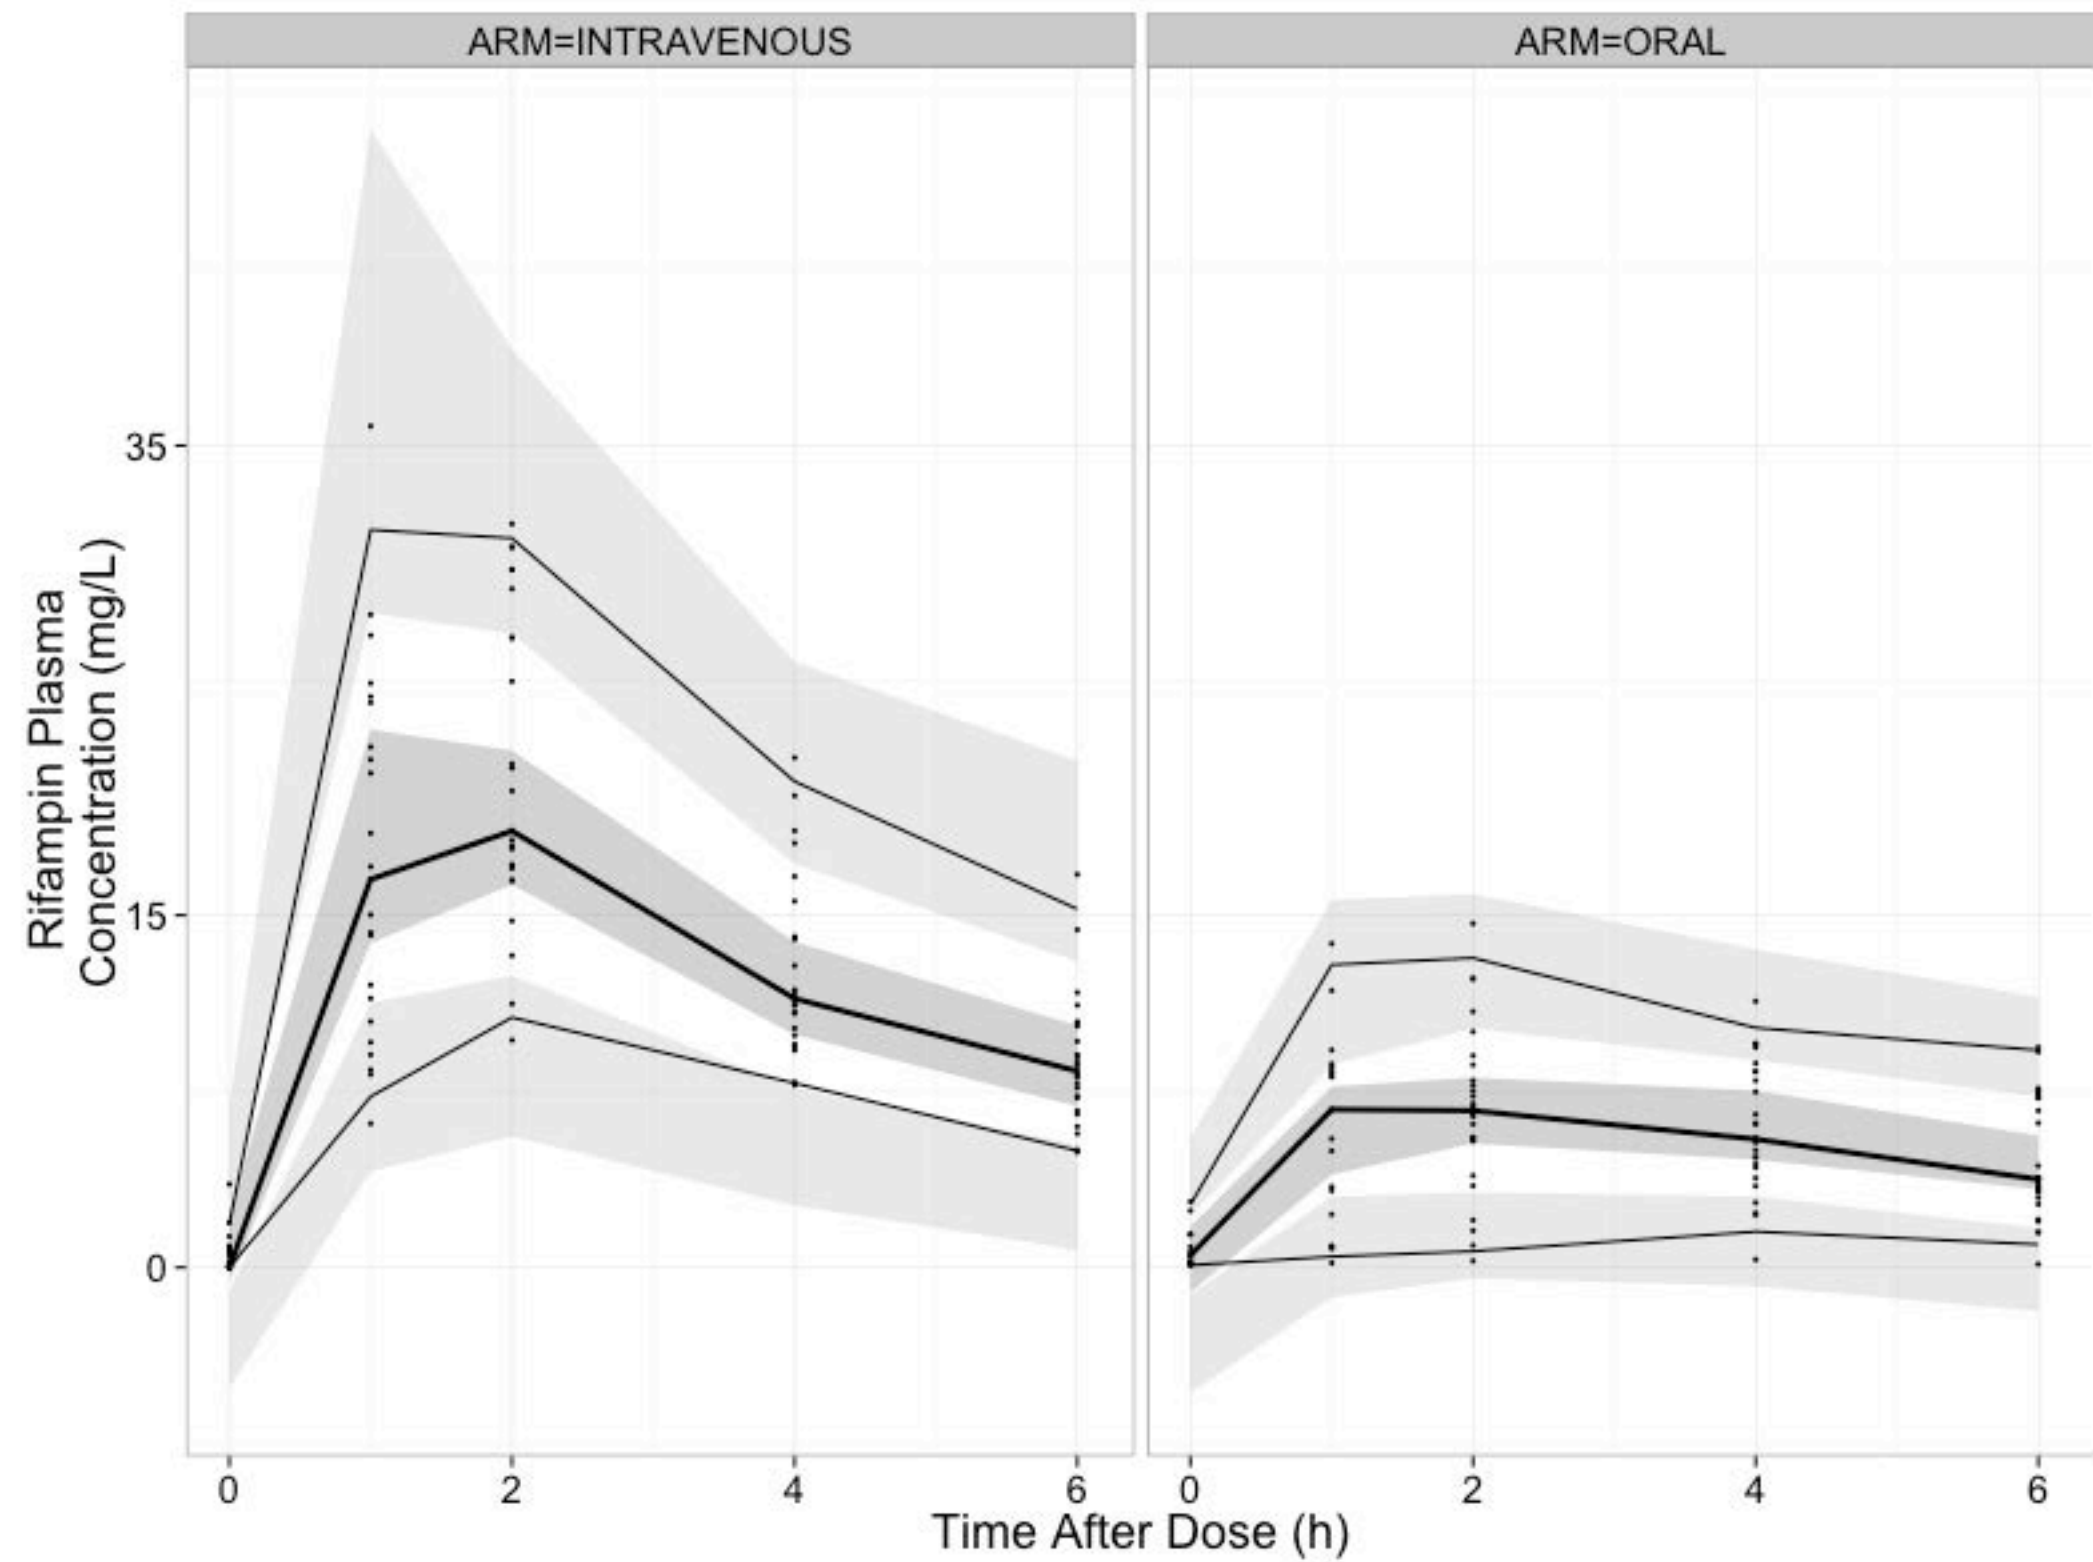

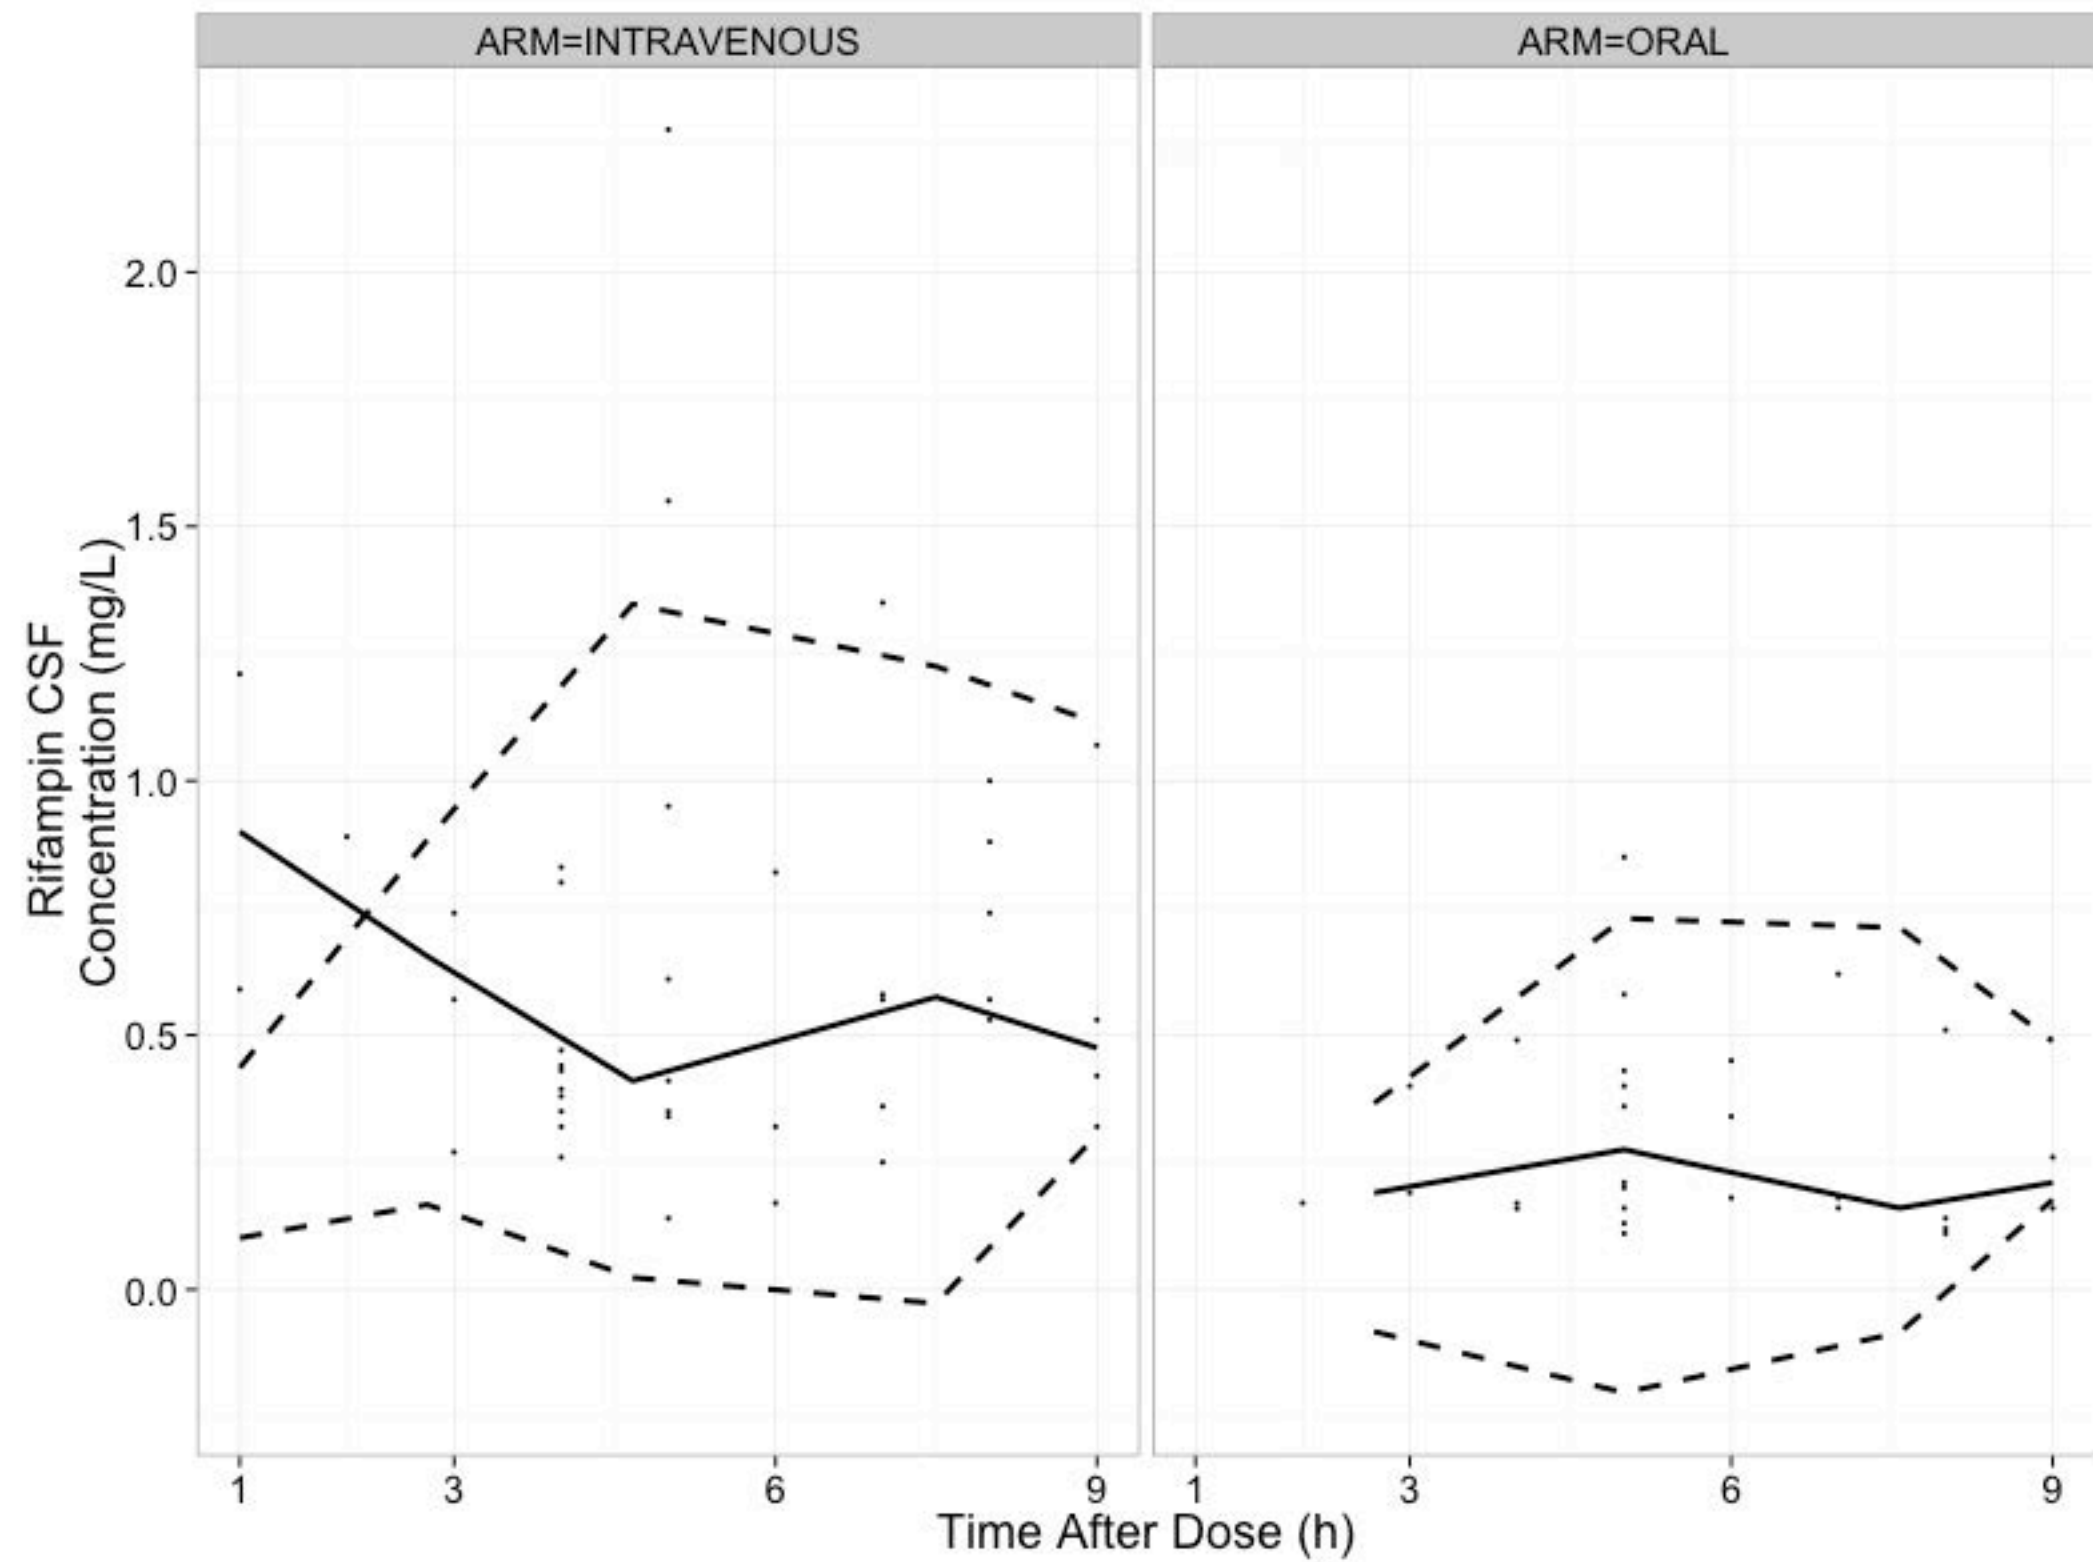

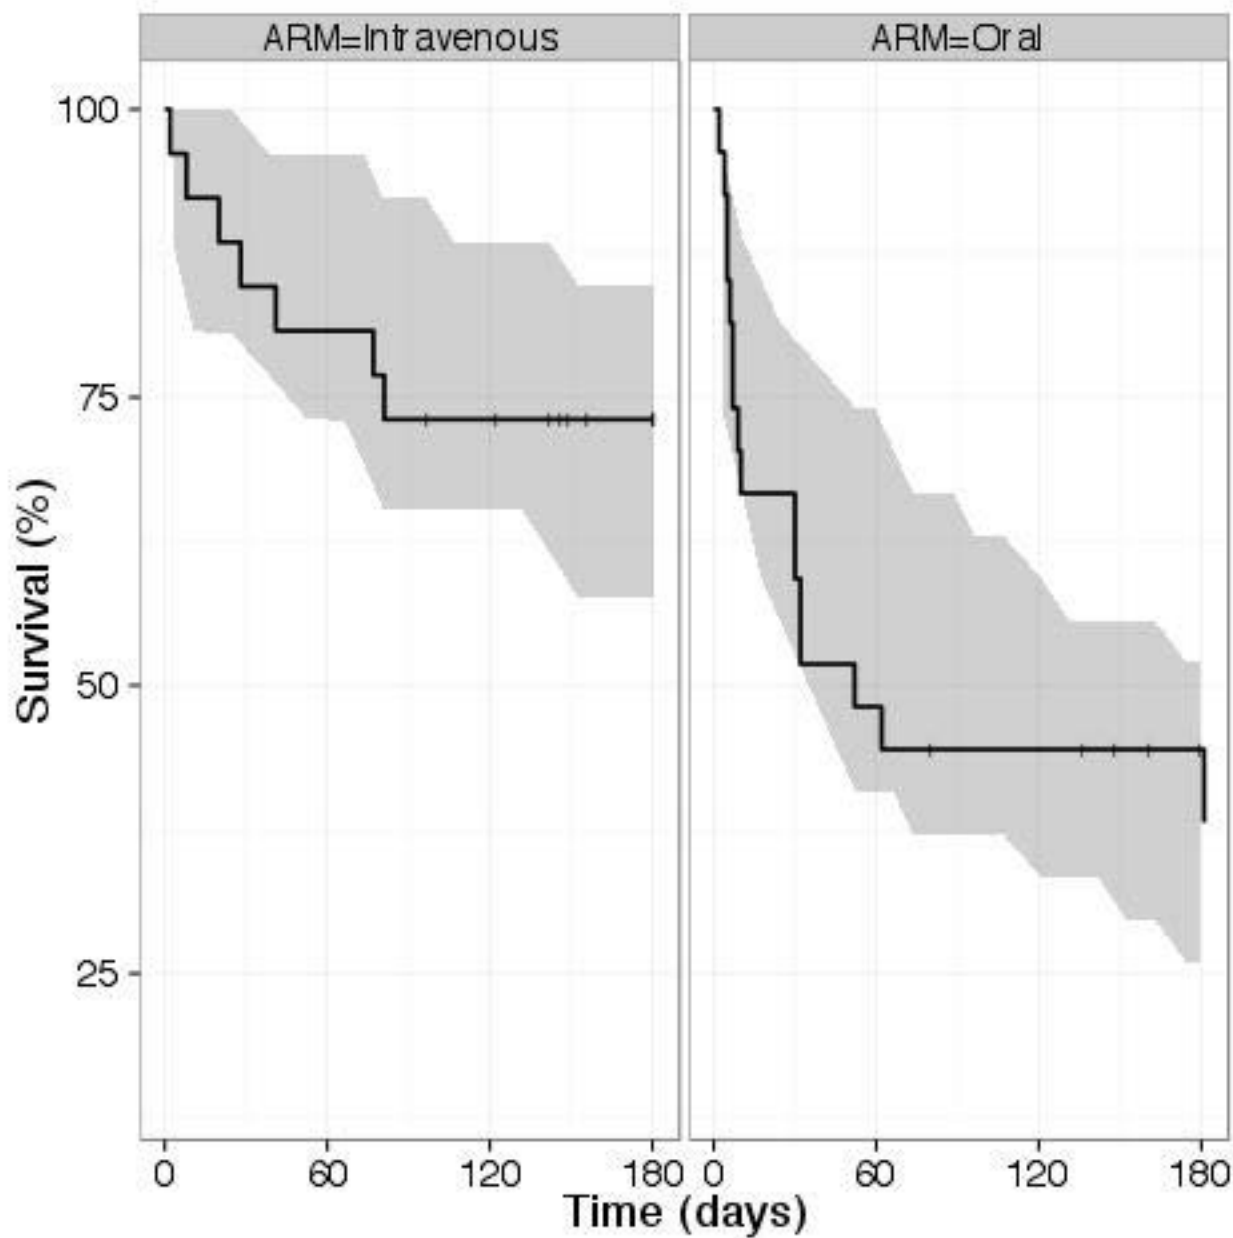

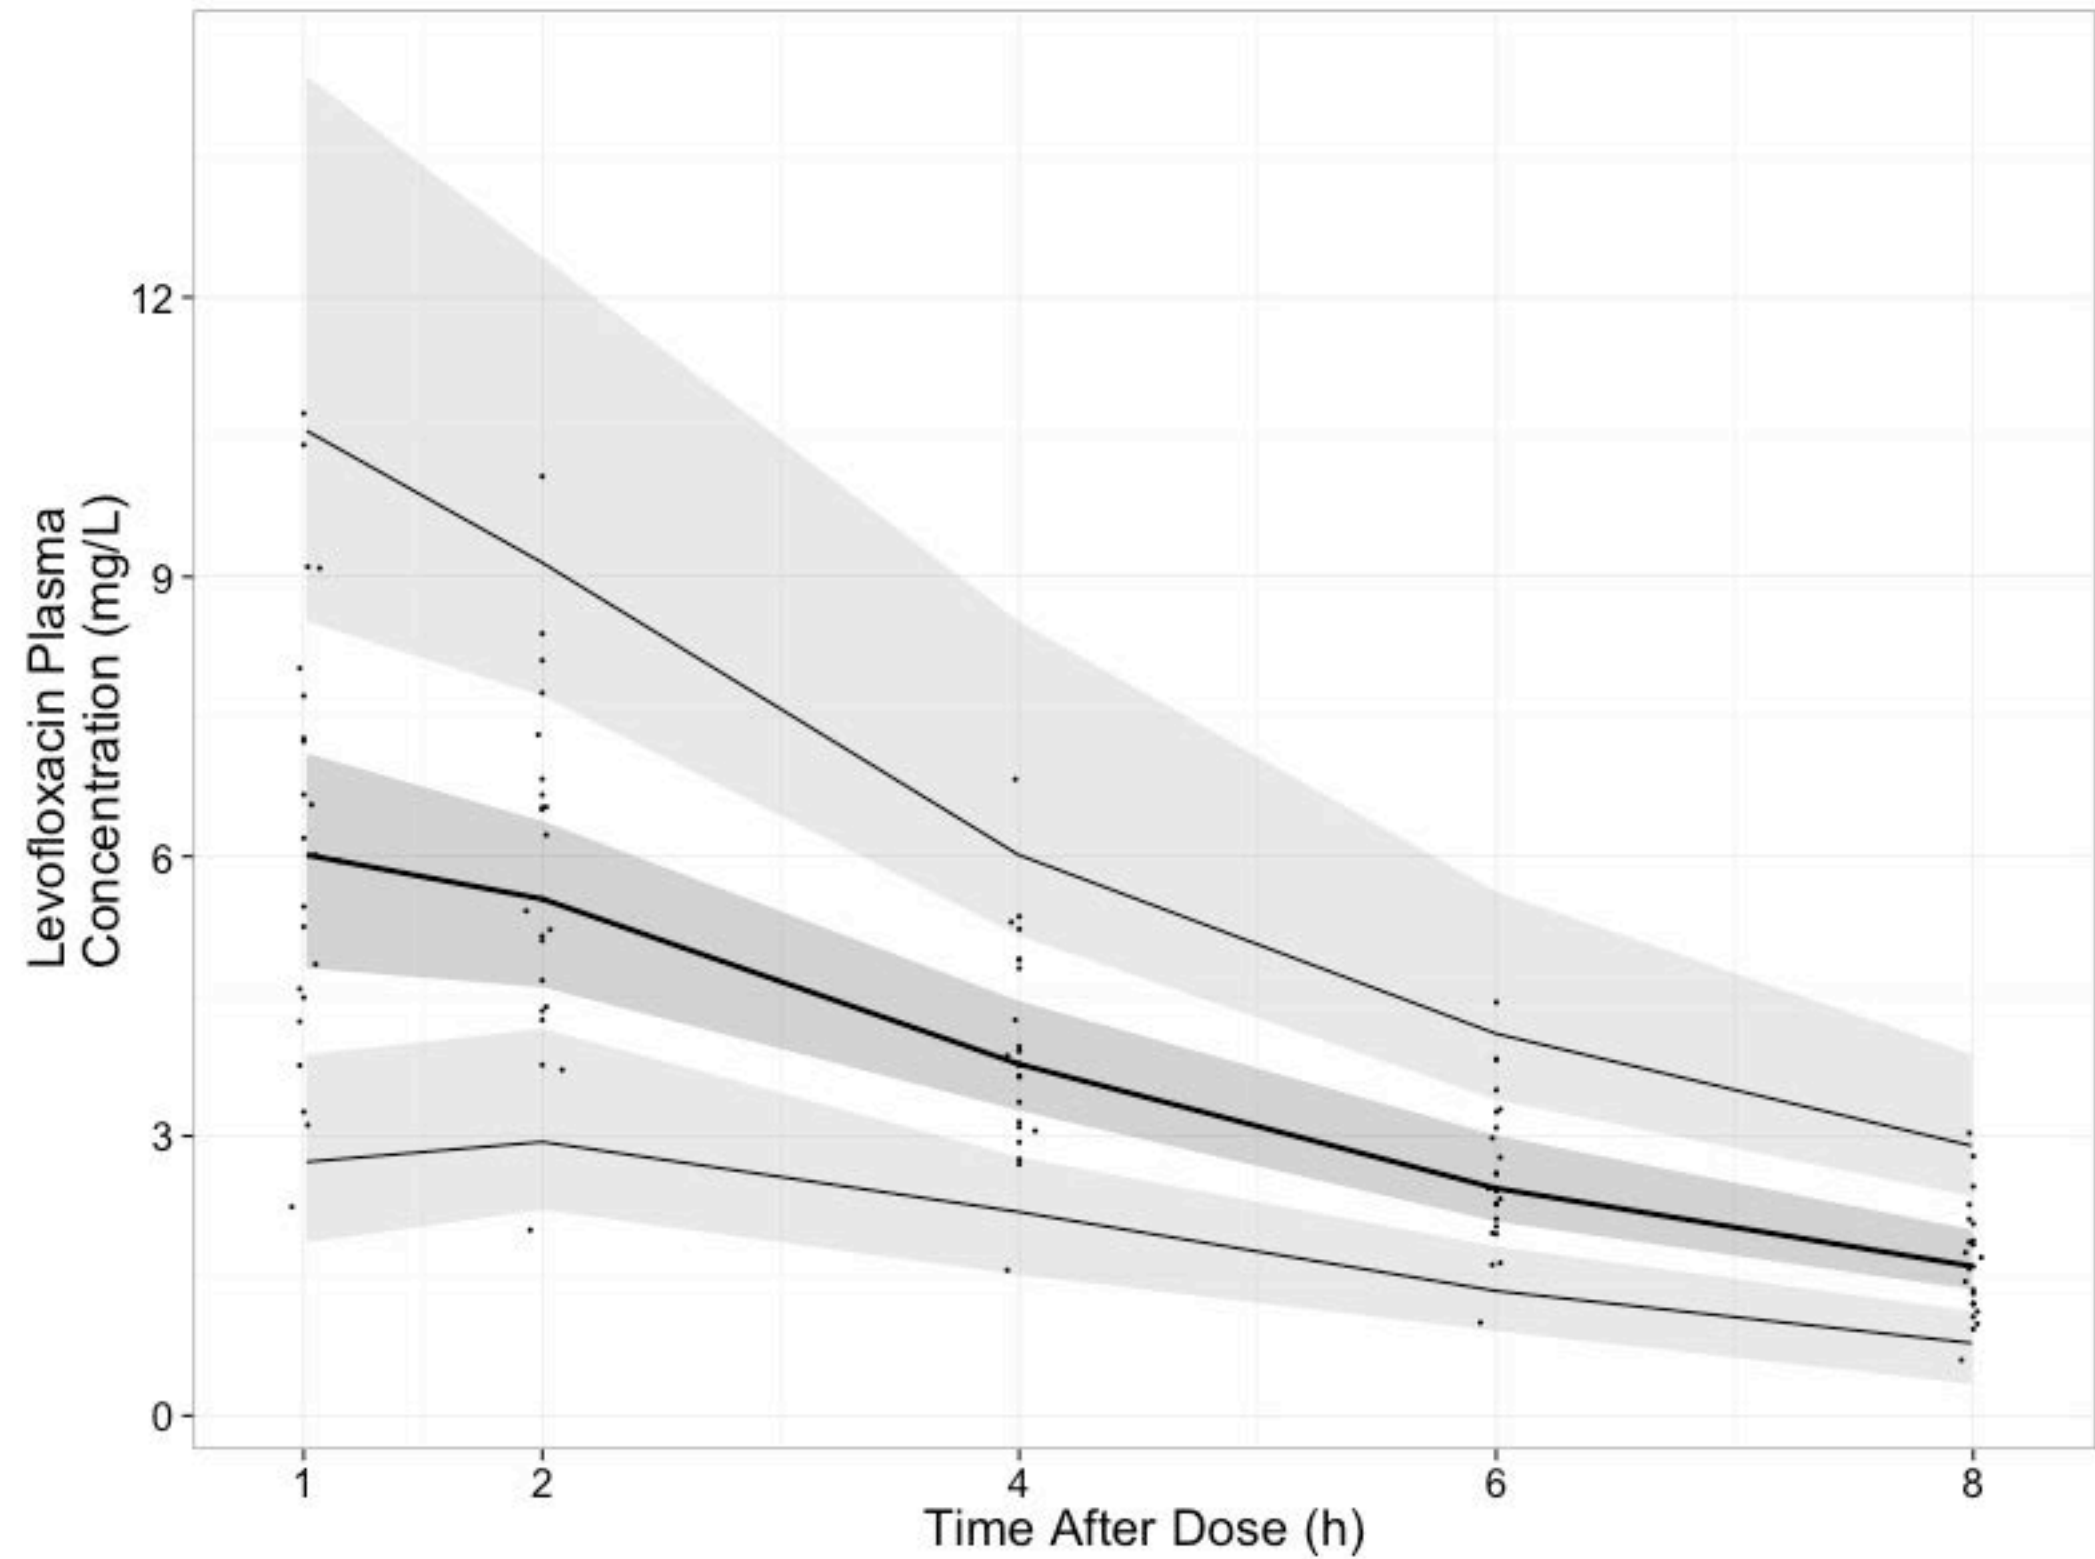

Supplement: NIHMS715069-supplement-Supp_TableS1-S2___FigureS1-S3.pdf [file NIHMS715069-supplement-Supp_TableS1-S2___FigureS1-S3.pdf]
